# Supplementary material
Source: PubMed Central journal article supplement (PMC3656385)
Supplement: NIHMS346497-supplement-1_si_001.pdf [file NIHMS346497-supplement-1_si_001.pdf]

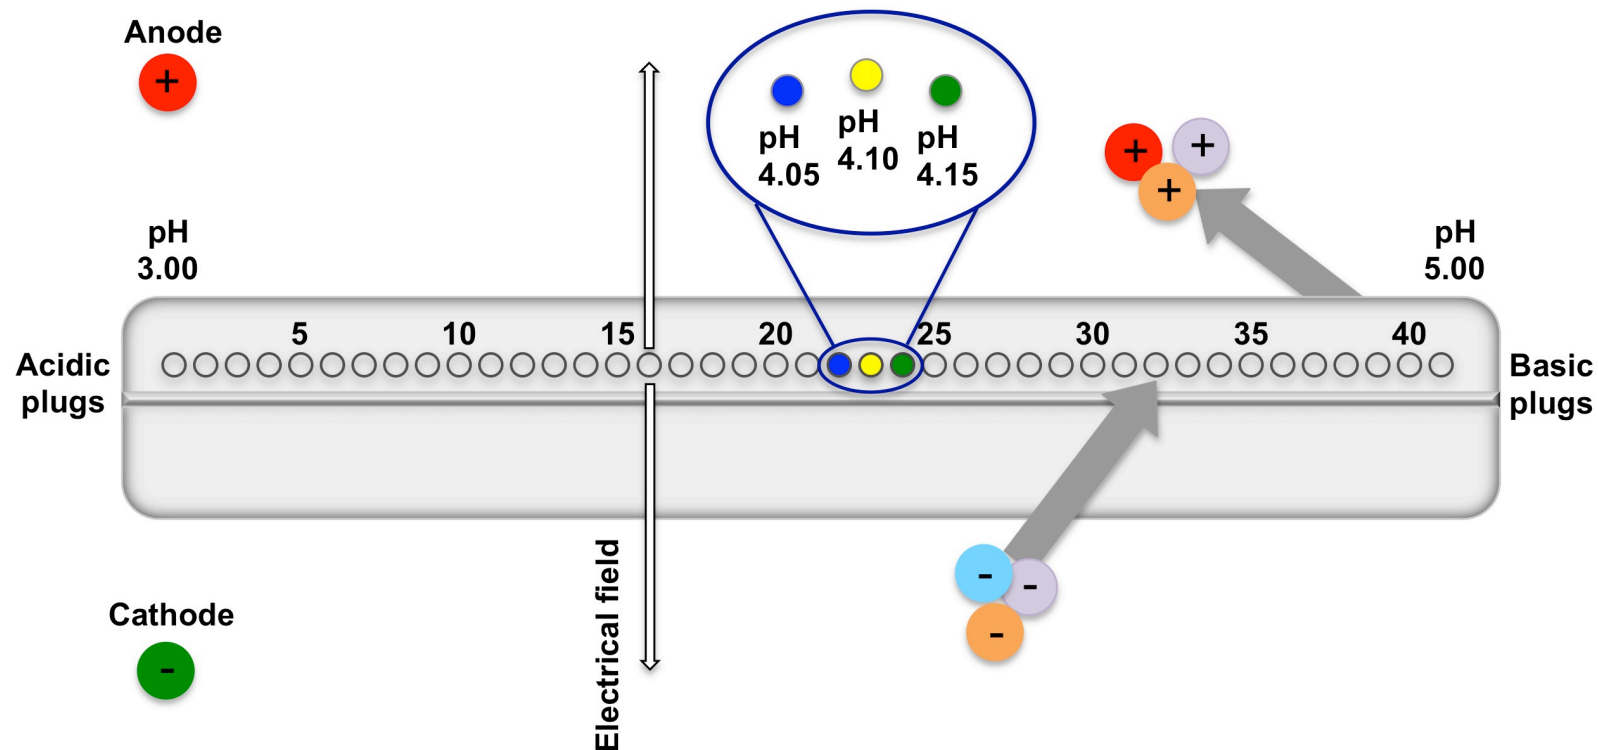

**Figure S1.** A schematic of the *dPC* and its operation. The *dPC* consists of 41 gel plugs that differ by 0.05 pH units (pH 3.00-5.00 *dPC* is shown). The chip uses a discontinuous pH gradient and each gel feature has a distinct pH with the electrical field perpendicular to the operation of the *dPC*, i.e., the peptide transits in and out of the gel until it encounters a gel plug with a pH that equals its pI value.

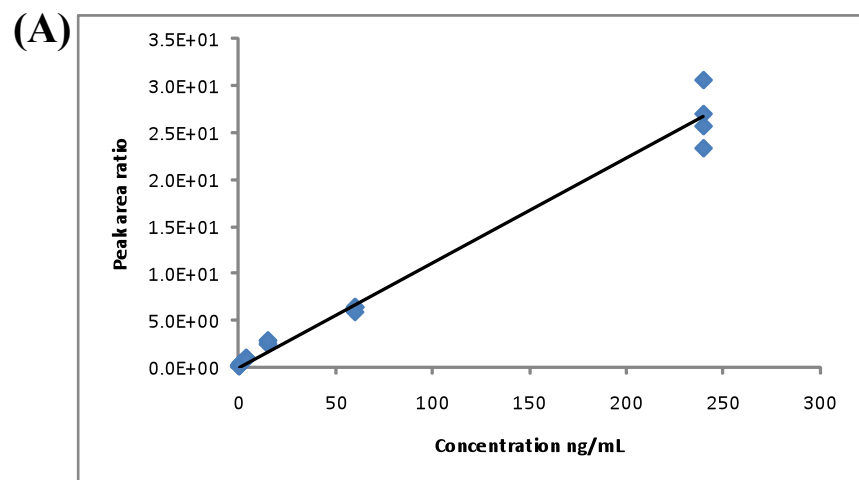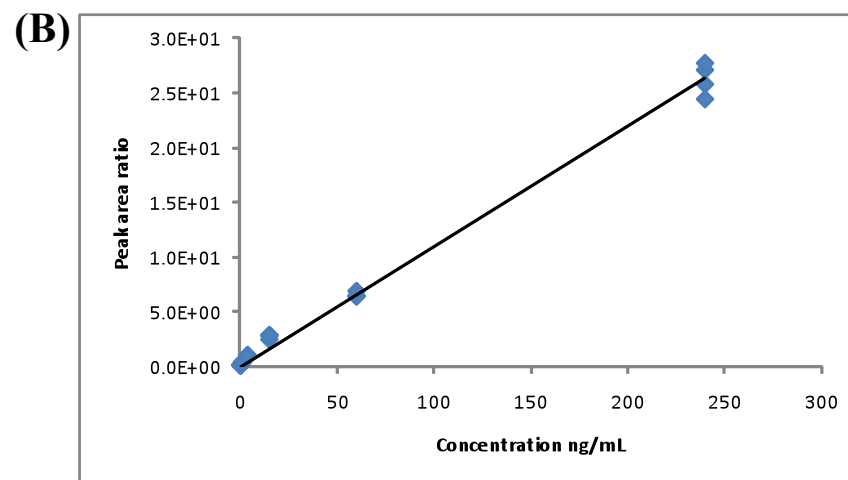

**Figure S2.** Calibration plots for PSA proteotypic peptides (range 0.12 – 240 ng/mL) (A) IVGGWECEK ( $r^2 = 0.9851$ ), (B) LSEPAELTDAVK ( $r^2 = 0.9941$ ). The peak area ratio of light to heavy peptide for different amounts of light peptide spiked into the depleted plasma digest was measured using the LC-Chip-SRM method and plotted versus the amount of light peptide.

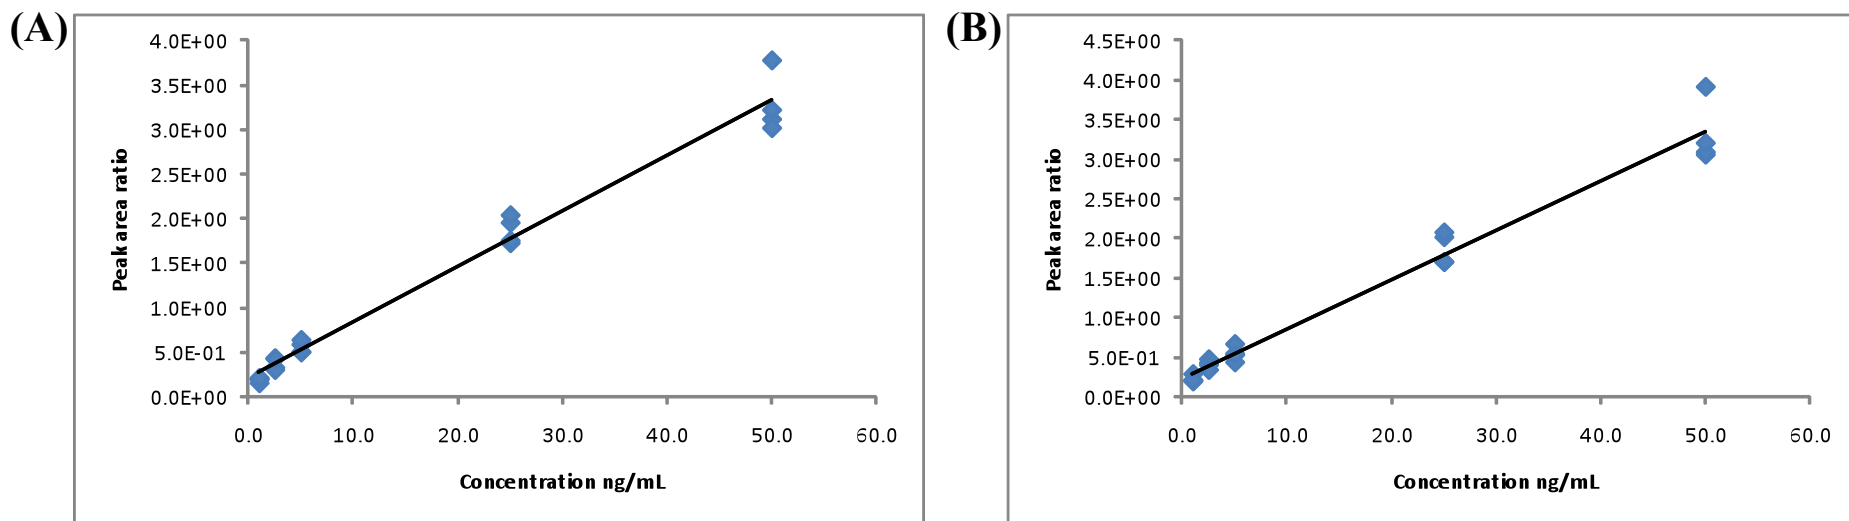

**Figure S3.** Calibration plots for quantitation of *d*PC enriched PSA peptides from clinical plasma samples (range 1.0 – 50 ng/mL) (A) IVGGWECEK ( $r^2 = 0.9812$ ) and (B) LSEPAELTDAVK ( $r^2 = 0.9752$ ). The peak area ratios of light to heavy peptide were measured using the LC-Chip-SRM method and plotted against the different concentrations of PSA standard protein added into female plasma prior to depletion of albumin and IgG.

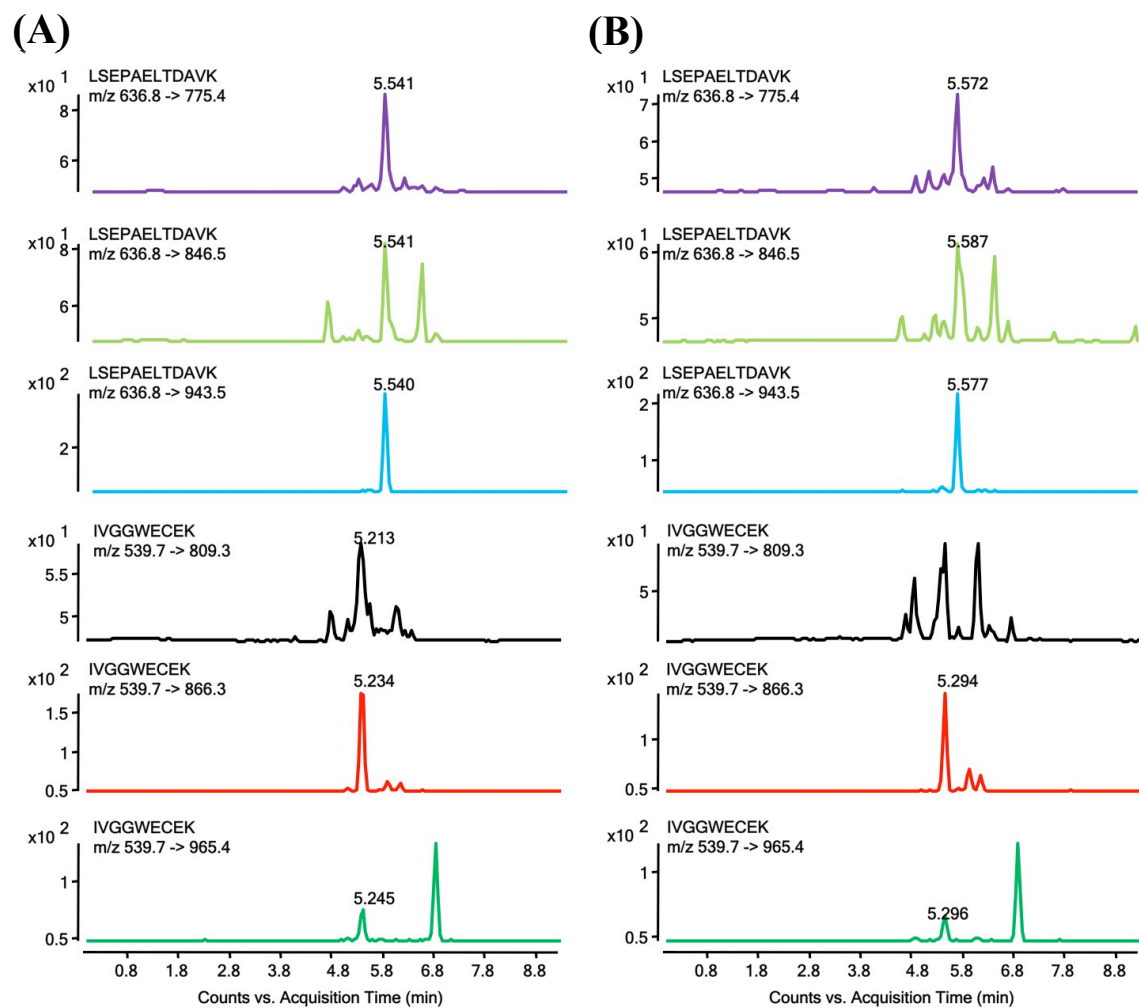

**Figure S4.** Comparison of the XICs acquired on all three SRM transitions for LSEPAELTDAVK (elution time 5.6 min) and IVGGWECEK (elution time 5.3 min) proteotypic peptides in (A) a patient with PSA level quantitated at 1.5 ng/mL and (B) the LOQ of 1.0 ng/mL for PSA protein added into plasma prior to depletion of albumin and IgG.

**Table S1.** Prostate specific antigen (PSA) concentrations measured in each sample using both methods<sup>a</sup>.

| <b>Sample</b> | <b>ELISA<br/>(ng/mL)</b> | <b>Chip/Chip/SRM<br/>(ng/mL)</b> |
|---------------|--------------------------|----------------------------------|
| Patient 1     | 9.8                      | 7.2                              |
| Patient 2     | 13                       | 11                               |
| Patient 3     | 7.6                      | 9.5                              |
| Patient 4     | 29                       | 26                               |
| Patient 5     | 15                       | 18                               |
| Control 1     | 4.1                      | 1.5                              |
| Control 2     | 2.8                      | 2.1                              |
| Control 3     | 2.2                      | 2.8                              |
| Control 4     | 4.9                      | 4.2                              |
| Control 5     | 1.5                      | 2.1                              |

<sup>a</sup>The PSA concentrations represent the average obtained for two measurements (technical replicates) of each clinical sample.
